# Supplementary material for: Facile fabrication of reduced graphene oxide/CuI/PANI nanocomposites with enhanced visible-light photocatalytic activity
Source: Royal Society of Chemistry journal article supplement (doi:10.1039/c6ra08358g), 2016-01-01
Supplement: c6ra08358g1.pdf [file c6ra08358g1.pdf]

## Supporting Information

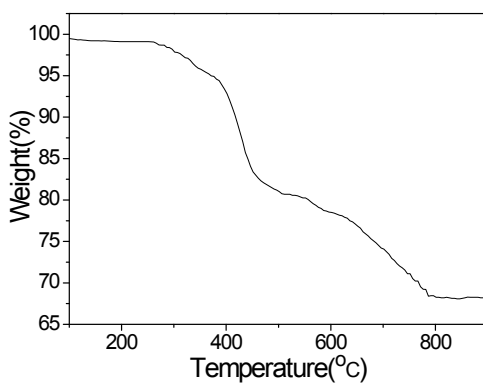

Fig 1S TG of rGO/CuI/PANI nanocomposites.

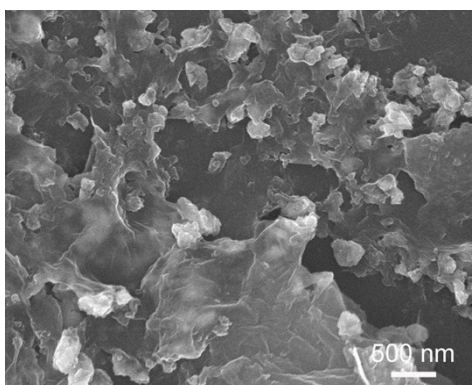

Fig. 2S SEM of rGO/CuI composites.

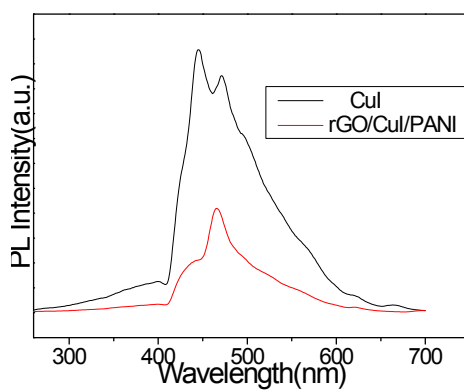

Fig. 3S PL spectra of CuI and rGO/CuI/PANI
